# Supplementary material for: Modular analysis of the control of flagellar Ca2+-spike trains produced by CatSper and CaV channels in sea urchin sperm
Source: PubMed Central journal article supplement (PMC7067495; doi:10.1371/journal.pcbi.1007605), 2020-03-02
Supplement: pcbi.1007605.s006.pdf [file pcbi.1007605.s006.pdf]

---

**Algorithm** Two-phase parameter space exploration

---

**with:**  $\vec{\lambda}^{cv}, \vec{\lambda}^{cs}$

$s \leftarrow 0.04$   
 $n \leftarrow 500$

**Phase 1**

$L \leftarrow \{\}$   
**for each**  $\theta^{cv} \in \{0.0001, 0.1, 0.2, \dots, 2\}$  **do**  
  **for each**  $\theta^{cs} \in \{0.0001, 0.1, 0.2, \dots, 2\}$  **do**  
     $\vec{\lambda} \leftarrow \theta^{cv} \vec{\lambda}^{cv} + \theta^{cs} \vec{\lambda}^{cs}$   
     $L \leftarrow L \cup \{\vec{\lambda}\}$   
  **end for**  
**end for**

**while** No coalescence of clouds of points in the projection plane  $(g_{cv}, g_{cs})$  **do**  
   $\vec{\lambda} \leftarrow \mathbf{Sample}(L)$   
  **for each**  $\lambda_i \in \vec{\lambda}$  **do**  
    **if**  $\lambda_i \notin \text{Upstream Module Parameter Subset}$  **then**  
       $x \sim \text{Normal}(0, s)$   
       $\epsilon \leftarrow e^x$   
    **else**  
       $\epsilon \leftarrow 1$   
    **end if**  
     $\lambda_i \leftarrow \lambda_i \times \epsilon$   
  **end for**  
   $L \leftarrow L \cup \{\vec{\lambda}\}$   
**end while**

**Phase 2**

$L_{Sel} \leftarrow \{\}$   
 $L_{Uns} \leftarrow \{\}$   
**for each**  $\vec{\lambda} \in L$  **do**  
  **if**  $\vec{\lambda}$  is Coherent with Observed Data (Sec. 4.4) **then**  
     $L_{Sel} \leftarrow L_{Sel} \cup \{\vec{\lambda}\}$   
  **end if**  
**end for**  
  
**while** No stable clustering in projection plane  $(g_{cv}, g_{cs})$  **do**  
   $iter \leftarrow 0$   
  **repeat**  
    **increment**  $iter$   
     $\vec{\lambda} \leftarrow \mathbf{Sample}(L_{Sel})$   
    **for each**  $\lambda_i \in \vec{\lambda}$  **do**  
      **if**  $\lambda_i \notin \text{Upstream Module Parameter Subset}$  **then**  
         $x \sim \text{Normal}(0, s)$   
         $\epsilon \leftarrow e^x$   
      **else**  
         $\epsilon \leftarrow 1$   
      **end if**  
       $\lambda_i \leftarrow \lambda_i \times \epsilon$   
    **end for**  
    **if**  $\vec{\lambda}$  is Coherent with Observed Data (Sec. 4.4) **then**  
       $L_{Sel} \leftarrow L_{Sel} \cup \{\vec{\lambda}\}$   
    **else**  
       $L_{Uns} \leftarrow L_{Uns} \cup \{\vec{\lambda}\}$   
    **end if**  
  **until**  $iter = n$   
**end while**

---
